# Supplementary material
Source: PubMed Central journal article supplement (PMC1636094)
Supplement: rspb20063590s02.pdf [file rspb20063590s02.pdf]

## **Appendix Tables 1 – 4**

Table 1 provides information relevant to the species origins and sample sources for the 59 populations that were sampled for this study, and each population is assigned an ascension number. Referenced by these ascension numbers, population sample sizes, means, standard deviations, standard errors, general linear model and Kruskal-Wallis statistics, Tukey's homogeneous subsets, and insular and continental means and weighted means are included in Tables 2A (agglutination), 2B (lysis), 3 (haptoglobin), and 4 (leukocytes).

Appendix, Table 1

| Pop. # | Genus             | Species                        | Origin   |                          | Native, Intro, Endem | Sample Source |                |                 | Sample Mo | Breeding Season |
|--------|-------------------|--------------------------------|----------|--------------------------|----------------------|---------------|----------------|-----------------|-----------|-----------------|
|        |                   |                                | Isl/Cont | Loc                      |                      | In/Ex situ    | Loc            | Captive/Wild    |           |                 |
| 01     | <i>Anas</i>       | <i>georgica</i> <sup>1</sup>   | Island   | South Georgia Island     | Endemic (subsp)      | Ex            | North Carolina | Captive         | 9         | Post-Breed      |
| 02     | <i>Anas</i>       | <i>laysanensis</i>             | Island   | Laysan Island            | Endemic (sp)         | Ex            | North Carolina | Captive         | 9         | Post-Breed      |
| 03     | <i>Anas</i>       | <i>georgica</i> <sup>1</sup>   | Cont     | South America            | Native               | Ex            | North Carolina | Captive         | 9         | Post-Breed      |
| 04     | <i>Anas</i>       | <i>rubripes</i>                | Cont     | North America            | Native               | Ex            | North Carolina | Captive         | 9         | Post-Breed      |
| 05     | <i>Branta</i>     | <i>sandvicensis</i>            | Island   | Hawaii (Hawaii)          | Native               | In            | Hawaii         | Captive         | 6         | Post-Breed      |
| 06     | <i>Branta</i>     | <i>sandvicensis</i>            | Island   | Hawaii                   | Native               | Ex            | North Carolina | Captive         | 9         | Post-Breed      |
| 07     | <i>Branta</i>     | <i>hutchinsii</i> <sup>1</sup> | Island   | Aleutian Islands, Alaska | Endemic (subsp)      | Ex            | North Carolina | Captive         | 9         | Post-Breed      |
| 08     | <i>Branta</i>     | <i>canadensis</i>              | Cont     | Illinois                 | Native               | In            | Illinois       | Wild            | 6         | Post-Breed      |
| 09     | <i>Buteo</i>      | <i>galapagoensis</i>           | Island   | Galapagos (Espanola)     | Endemic (sp)         | In            | Espanola       | Wild            | 5-6-7-8   | Breed           |
| 10     | <i>Buteo</i>      | <i>galapagoensis</i>           | Island   | Galapagos (Fernandina)   | Endemic (sp)         | In            | Fernandina     | Wild            | 5-6-7     | Breed           |
| 11     | <i>Buteo</i>      | <i>galapagoensis</i>           | Island   | Galapagos (Isabela)      | Endemic (sp)         | In            | Isabela        | Wild            | 5-6-7-8   | Breed           |
| 12     | <i>Buteo</i>      | <i>galapagoensis</i>           | Island   | Galapagos (Marchena)     | Endemic (sp)         | In            | Marchena       | Wild            | 5-6-7-8   | Breed           |
| 13     | <i>Buteo</i>      | <i>galapagoensis</i>           | Island   | Galapagos (Pinta)        | Endemic (sp)         | In            | Pinta          | Wild            | 5-6-7     | Breed           |
| 14     | <i>Buteo</i>      | <i>galapagoensis</i>           | Island   | Galapagos (Santiago)     | Endemic (sp)         | In            | Santiago       | Wild            | 5-6-7     | Breed           |
| 15     | <i>Buteo</i>      | <i>galapagoensis</i>           | Island   | Galapagos (Santa Fe)     | Endemic (sp)         | In            | Santa Fe       | Wild            | 5-6-7-8   | Breed           |
| 16     | <i>Buteo</i>      | <i>solitarius</i>              | Island   | Hawaii (Hawaii)          | Endemic (sp)         | In            | Hawaii         | Captive (Rehab) | 6         | Breed           |
| 17     | <i>Buteo</i>      | <i>swainsoni</i>               | Cont     | Idaho                    | Native               | In            | Idaho          | Wild            | 7-8       | Breed           |
| 18     | <i>Cardinalis</i> | <i>cardinalis</i>              | Island   | Bermuda                  | Introduced           | In            | Bermuda        | Wild            | 5-6       | Breed           |
| 19     | <i>Cardinalis</i> | <i>cardinalis</i>              | Island   | Hawaii (Hawaii)          | Introduced           | In            | Hawaii         | Wild            | 6         | Breed           |
| 20     | <i>Cardinalis</i> | <i>cardinalis</i>              | Island   | Hawaii (Oahu)            | Introduced           | In            | Oahu           | Wild            | 6         | Breed           |
| 21     | <i>Cardinalis</i> | <i>cardinalis</i>              | Cont     | Missouri                 | Native               | In            | Missouri       | Wild            | 2         | Winter          |
| 22     | <i>Cardinalis</i> | <i>cardinalis</i>              | Cont     | Missouri                 | Native               | In            | Missouri       | Wild            | 4-5       | Breed           |
| 23     | <i>Cardinalis</i> | <i>cardinalis</i>              | Cont     | Missouri                 | Native               | In            | Missouri       | Wild            | 8-9-10    | Post-Breed      |
| 24     | <i>Cardinalis</i> | <i>cardinalis</i>              | Cont     | Missouri                 | Native               | In            | Missouri       | Captive (Rehab) | 8-9-10    | Post-Breed      |
| 25     | <i>Columba</i>    | <i>livia</i>                   | Island   | Bermuda                  | Introduced           | In            | Bermuda        | Wild            | 5-6       | Breed           |
| 26     | <i>Columba</i>    | <i>livia</i>                   | Island   | Galapagos (Isabela)      | Introduced           | In            | Isabela        | Wild            | 7         | Breed           |
| 27     | <i>Columba</i>    | <i>livia</i>                   | Cont     | Missouri                 | Introduced           | In            | Missouri       | Captive (Rehab) | 9         | Post-Breed      |
| 28     | <i>Columbina</i>  | <i>passerina</i>               | Island   | Bermuda                  | Non-Native           | In            | Bermuda        | Wild            | 5-6       | Breed           |
| 29     | <i>Columbina</i>  | <i>talpacoti</i>               | Cont     | Panama                   | Native               | In            | Panama         | Wild            | 3-4       | Breed           |
| 30     | <i>Dendroica</i>  | <i>petechia</i> <sup>1</sup>   | Island   | Galapagos (Isabela)      | Endemic (subsp)      | In            | Isabela        | Wild            | 7         | Post-Breed      |
| 31     | <i>Dendroica</i>  | <i>petechia</i> <sup>1</sup>   | Island   | Galapagos (Santa Cruz)   | Endemic (subsp)      | In            | Santa Cruz     | Wild            | 7         | Post-Breed      |
| 32     | <i>Dendroica</i>  | <i>petechia</i>                | Cont     | Michigan                 | Native               | In            | Michigan       | Wild            | 7         | Breed           |

|    |                    |                             |        |                        |                 |    |            |                 |       |            |
|----|--------------------|-----------------------------|--------|------------------------|-----------------|----|------------|-----------------|-------|------------|
| 33 | <i>Dumetella</i>   | <i>carolinensis</i>         | Island | Bermuda                | Native          | In | Bermuda    | Wild            | 5-6   | Breed      |
| 34 | <i>Dumetella</i>   | <i>carolinensis</i>         | Cont   | Missouri               | Native          | In | Missouri   | Wild            | 4-5   | Breed      |
| 35 | <i>Dumetella</i>   | <i>carolinensis</i>         | Cont   | Missouri               | Native          | In | Missouri   | Wild            | 8-9   | Post-Breed |
| 36 | <i>Dumetella</i>   | <i>carolinensis</i>         | Cont   | Missouri               | Native          | In | Missouri   | Captive (Rehab) | 8-9   | Post-Breed |
| 37 | <i>Hemignathus</i> | <i>virens</i>               | Island | Hawaii (Hawaii)        | Endemic (gen)   | In | Hawaii     | Wild            | 6     | Breed      |
| 38 | <i>Carpodacus</i>  | <i>mexicanus</i>            | Island | Hawaii (Hawaii)        | Introduced      | In | Hawaii     | Wild            | 6     | Breed      |
| 39 | <i>Carpodacus</i>  | <i>mexicanus</i>            | Island | Hawaii (Oahu)          | Introduced      | In | Oahu       | Wild            | 6     | Breed      |
| 40 | <i>Carpodacus</i>  | <i>mexicanus</i>            | Cont   | New Jersey             | Native          | In | New Jersey | Wild            | 3     | Pre-Breed  |
| 41 | <i>Nesomimus</i>   | <i>parvulus</i>             | Island | Galapagos (Genovesa)   | Endemic (gen)   | In | Galapagos  | Wild            | 7     | Post-Breed |
| 42 | <i>Mimus</i>       | <i>polyglottos</i>          | Cont   | Missouri               | Native          | In | Missouri   | Captive (Rehab) | 9     | Post-Breed |
| 43 | <i>Passer</i>      | <i>domesticus</i>           | Island | Bermuda                | Introduced      | In | Bermuda    | Wild            | 5-6   | Breed      |
| 44 | <i>Passer</i>      | <i>domesticus</i>           | Island | Hawaii (Hawaii)        | Introduced      | In | Hawaii     | Wild            | 6     | Breed      |
| 45 | <i>Passer</i>      | <i>domesticus</i>           | Island | Hawaii (Oahu)          | Introduced      | In | Oahu       | Wild            | 6     | Breed      |
| 46 | <i>Passer</i>      | <i>domesticus</i>           | Cont   | Missouri               | Introduced      | In | Missouri   | Wild            | 5-6-7 | Breed      |
| 47 | <i>Sialia</i>      | <i>sialis</i>               | Island | Bermuda                | Native          | In | Bermuda    | Wild            | 5-6   | Breed      |
| 48 | <i>Sialia</i>      | <i>sialis</i>               | Cont   | Illinois               | Native          | In | Illinois   | Wild            | 5     | Breed      |
| 49 | <i>Sturnus</i>     | <i>vulgaris</i>             | Island | Bermuda                | Introduced      | In | Bermuda    | Wild            | 5-6   | Breed      |
| 50 | <i>Sturnus</i>     | <i>vulgaris</i>             | Cont   | Missouri               | Introduced      | In | Missouri   | Wild            | 4-5   | Breed      |
| 51 | <i>Vireo</i>       | <i>griseus</i> <sup>1</sup> | Island | Bermuda                | Endemic (subsp) | In | Bermuda    | Wild            | 5-6   | Breed      |
| 52 | <i>Vireo</i>       | <i>griseus</i>              | Cont   | Missouri               | Native          | In | Missouri   | Wild            | 4-5   | Breed      |
| 53 | <i>Vireo</i>       | <i>griseus</i>              | Cont   | Missouri               | Native          | In | Missouri   | Wild            | 8-9   | Post-Breed |
| 54 | <i>Zenaida</i>     | <i>macroura</i>             | Island | Bermuda                | Introduced      | In | Bermuda    | Wild            | 5-6   | Breed      |
| 55 | <i>Zenaida</i>     | <i>galapagoensis</i>        | Island | Galapagos (Genovesa)   | Endemic (sp)    | In | Genovesa   | Wild            | 7     | Post-Breed |
| 56 | <i>Zenaida</i>     | <i>galapagoensis</i>        | Island | Galapagos (Santa Cruz) | Endemic (sp)    | In | Santa Cruz | Wild            | 7     | Post-Breed |
| 57 | <i>Zenaida</i>     | <i>macroura</i>             | Cont   | Missouri               | Native          | In | Missouri   | Wild            | 1     | Winter     |
| 58 | <i>Zenaida</i>     | <i>macroura</i>             | Cont   | Missouri               | Native          | In | Missouri   | Wild            | 4     | Breed      |
| 59 | <i>Zenaida</i>     | <i>macroura</i>             | Cont   | Missouri               | Native          | In | Missouri   | Wild            | 6     | Breed      |

1 Endemic subspecies: #01 A. g. georgica, #03 A. g. spinicauda, #07 B. h. leucopareia, #30 and #31 D. p. aureolla, #51 V. g. bermudianus.

Appendix, Table 2A

| <b>AGGLUTINATION</b> |                   |          |    |         |        |        |    |                         |              |            |              |       |                 |                  |          |  |
|----------------------|-------------------|----------|----|---------|--------|--------|----|-------------------------|--------------|------------|--------------|-------|-----------------|------------------|----------|--|
| <b>(titers)</b>      |                   |          |    |         |        |        |    |                         |              |            |              |       |                 |                  |          |  |
| Origin               |                   |          |    |         |        |        |    |                         |              |            |              |       |                 |                  |          |  |
| Pop. #               | Genus             | Isl/Cont | N  | Mean    | SD     | SE     | df | K-W<br>Chi <sup>2</sup> | Sig          | ANOVA<br>F | Sig          | Tukey | Mean<br>(Indiv) | Weighted<br>Mean | Isl/Cont |  |
| 01                   | <i>Anas</i>       | Island   | 8  | 6.1250  | 0.5175 | 0.1830 |    |                         |              |            |              | a     |                 |                  |          |  |
| 02                   | <i>Anas</i>       | Island   | 8  | 10.0000 | 0.8018 | 0.2835 |    |                         |              |            |              | c     | 8.1             | <b>8.1</b>       | I        |  |
| 03                   | <i>Anas</i>       | Cont     | 8  | 7.8125  | 1.3076 | 0.4623 |    |                         |              |            |              | b     |                 |                  |          |  |
| 04                   | <i>Anas</i>       | Cont     | 6  | 7.6667  | 0.9832 | 0.4014 | 3  | 21.028                  | <b>0.000</b> | 22.759     | <b>0.000</b> | b     | 7.8             | <b>7.7</b>       | C        |  |
| 05                   | <i>Branta</i>     | Island   | 5  | 7.3000  | 1.3964 | 0.6245 |    |                         |              |            |              |       |                 |                  |          |  |
| 06                   | <i>Branta</i>     | Island   | 8  | 7.0625  | 1.2082 | 0.4272 |    |                         |              |            |              |       |                 |                  |          |  |
| 07                   | <i>Branta</i>     | Island   | 7  | 8.2143  | 0.7559 | 0.2857 |    |                         |              |            |              |       | 7.5             | <b>7.5</b>       | I        |  |
| 08                   | <i>Branta</i>     | Cont     | 26 | 7.4038  | 1.2886 | 0.2527 | 3  | 4.450                   | 0.217        | 1.213      | 0.317        |       | 7.4             | <b>7.4</b>       | C        |  |
| 09                   | <i>Buteo</i>      | Island   | 3  | 6.9167  | 1.0104 | 0.5833 |    |                         |              |            |              | a     |                 |                  |          |  |
| 10                   | <i>Buteo</i>      | Island   | 15 | 9.3333  | 1.6165 | 0.4174 |    |                         |              |            |              | a     |                 |                  |          |  |
| 11                   | <i>Buteo</i>      | Island   | 3  | 9.5833  | 1.4216 | 0.8207 |    |                         |              |            |              | a     |                 |                  |          |  |
| 12                   | <i>Buteo</i>      | Island   | 5  | 10.3500 | 0.8588 | 0.3841 |    |                         |              |            |              | a     |                 |                  |          |  |
| 13                   | <i>Buteo</i>      | Island   | 7  | 8.6429  | 1.5736 | 0.5948 |    |                         |              |            |              | a     |                 |                  |          |  |
| 14                   | <i>Buteo</i>      | Island   | 8  | 9.0625  | 1.6298 | 0.5762 |    |                         |              |            |              | a     |                 |                  |          |  |
| 15                   | <i>Buteo</i>      | Island   | 5  | 7.1500  | 0.7826 | 0.3500 |    |                         |              |            |              | a     |                 |                  |          |  |
| 16                   | <i>Buteo</i>      | Island   | 5  | 8.1000  | 2.9026 | 1.2981 |    |                         |              |            |              | a     | 8.8             | <b>8.7</b>       | I        |  |
| 17                   | <i>Buteo</i>      | Cont     | 21 | 7.5952  | 2.4628 | 0.5374 | 8  | 19.409                  | <b>0.013</b> | 2.274      | <b>0.033</b> | a     | 7.6             | <b>7.6</b>       | C        |  |
| 18                   | <i>Cardinalis</i> | Island   | 2  | 7.7500  | 0.0000 | 0.0000 |    |                         |              |            |              |       |                 |                  |          |  |
| 19                   | <i>Cardinalis</i> | Island   | 22 | 6.5000  | 1.3093 | 0.2791 |    |                         |              |            |              |       |                 |                  |          |  |
| 20                   | <i>Cardinalis</i> | Island   | 5  | 5.2500  | 1.7766 | 0.7945 |    |                         |              |            |              |       | 6.4             | <b>6.4</b>       | I        |  |
| 21                   | <i>Cardinalis</i> | Cont     | 9  | 6.8333  | 0.7395 | 0.2465 |    |                         |              |            |              |       |                 |                  |          |  |
| 22                   | <i>Cardinalis</i> | Cont     | 11 | 6.3182  | 1.3652 | 0.4116 |    |                         |              |            |              |       |                 |                  |          |  |
| 23                   | <i>Cardinalis</i> | Cont     | 10 | 6.5500  | 0.8563 | 0.2708 |    |                         |              |            |              |       |                 |                  |          |  |
| 24                   | <i>Cardinalis</i> | Cont     | 3  | 6.0000  | 1.7321 | 1.0000 | 6  | 9.689                   | 0.138        | 1.398      | 0.232        |       | 6.5             | <b>6.5</b>       | C        |  |
| 25                   | <i>Columba</i>    | Island   | 8  | 5.5313  | 1.8049 | 0.6381 |    |                         |              |            |              | ab    |                 |                  |          |  |
| 26                   | <i>Columba</i>    | Island   | 5  | 7.8000  | 0.5701 | 0.2550 |    |                         |              |            |              | b     | 6.4             | <b>6.5</b>       | I        |  |
| 27                   | <i>Columba</i>    | Cont     | 7  | 4.0714  | 3.2968 | 1.2461 | 2  | 6.032                   | <b>0.049</b> | 3.863      | <b>0.041</b> | a     | 4.1             | <b>4.1</b>       | C        |  |
| 28                   | <i>Columbina</i>  | Island   | 15 | 4.8667  | 2.4014 | 0.6200 |    |                         |              |            |              |       | 4.9             | <b>4.9</b>       | I        |  |
| 29                   | <i>Columbina</i>  | Cont     | 6  | 4.1250  | 2.4622 | 1.0052 | 1  | 0.125                   | 0.724        | 0.403      | 0.533        |       | 4.1             | <b>4.1</b>       | C        |  |
| 30                   | <i>Dendroica</i>  | Island   | 8  | 4.0000  | 0.4629 | 0.1637 |    |                         |              |            |              |       | 4.3             | <b>4.3</b>       | I        |  |
| 31                   | <i>Dendroica</i>  | Island   | 8  | 4.5625  | 1.5910 | 0.5625 |    |                         |              |            |              |       | 4.3             | <b>4.3</b>       | I        |  |
| 32                   | <i>Dendroica</i>  | Cont     | 5  | 3.7000  | 2.2804 | 1.0198 | 2  | 2.153                   | 0.341        | 0.574      | 0.573        |       | 3.7             | <b>3.7</b>       | C        |  |

|    |                    |        |    |        |        |        |   |       |              |       |       |  |     |            |   |
|----|--------------------|--------|----|--------|--------|--------|---|-------|--------------|-------|-------|--|-----|------------|---|
| 33 | <b>Dumetella</b>   | Island | 13 | 4.5769 | 2.0901 | 0.5797 |   |       |              |       |       |  | 4.6 | <b>4.6</b> | I |
| 34 | <b>Dumetella</b>   | Cont   | 17 | 4.4706 | 1.9880 | 0.4822 |   |       |              |       |       |  |     |            |   |
| 35 | <b>Dumetella</b>   | Cont   | 19 | 4.7368 | 2.1945 | 0.5035 |   |       |              |       |       |  |     |            |   |
| 36 | <b>Dumetella</b>   | Cont   | 2  | 3.5000 | 3.5355 | 2.5000 | 3 | 0.812 | 0.847        | 0.217 | 0.884 |  | 4.6 | <b>4.4</b> | C |
| 37 | <b>Hemignathus</b> | Island | 2  | 4.7500 | 0.3536 | 0.2500 |   |       |              |       |       |  |     |            |   |
| 38 | <b>Carpodacus</b>  | Island | 16 | 3.5938 | 1.1138 | 0.2785 |   |       |              |       |       |  |     |            |   |
| 39 | <b>Carpodacus</b>  | Island | 16 | 2.8438 | 1.4913 | 0.3728 |   |       |              |       |       |  | 3.3 | <b>3.4</b> | I |
| 40 | <b>Carpodacus</b>  | Cont   | 4  | 3.2500 | 0.8660 | 0.4330 | 3 | 6.721 | 0.081        | 1.862 | 0.155 |  | 3.3 | <b>3.3</b> | C |
| 41 | <b>Nesomimus</b>   | Island | 8  | 5.0000 | 2.0000 | 0.7071 |   |       |              |       |       |  | 5.0 | <b>5.0</b> | I |
| 42 | <b>Mimus</b>       | Cont   | 8  | 4.6875 | 1.0670 | 0.3772 | 1 | 0.102 | 0.750        | 0.152 | 0.702 |  | 4.7 | <b>4.7</b> | C |
| 43 | <b>Passer</b>      | Island | 26 | 6.3654 | 1.3119 | 0.2573 |   |       |              |       |       |  |     |            |   |
| 44 | <b>Passer</b>      | Island | 13 | 6.5769 | 1.6627 | 0.4611 |   |       |              |       |       |  |     |            |   |
| 45 | <b>Passer</b>      | Island | 6  | 6.1250 | 1.4296 | 0.5836 |   |       |              |       |       |  | 6.4 | <b>6.4</b> | I |
| 46 | <b>Passer</b>      | Cont   | 12 | 5.6875 | 1.7027 | 0.4915 | 3 | 2.486 | 0.478        | 0.840 | 0.478 |  | 5.7 | <b>5.7</b> | C |
| 47 | <b>Sialia</b>      | Island | 7  | 3.3571 | 1.7491 | 0.6611 |   |       |              |       |       |  | 3.4 | <b>3.4</b> | I |
| 48 | <b>Sialia</b>      | Cont   | 11 | 4.1818 | 1.8203 | 0.5489 | 1 | 0.305 | 0.581        | 0.904 | 0.356 |  | 4.2 | <b>4.2</b> | C |
| 49 | <b>Sturnus</b>     | Island | 10 | 3.8500 | 1.1797 | 0.3731 |   |       |              |       |       |  | 3.9 | <b>3.9</b> | I |
| 50 | <b>Sturnus</b>     | Cont   | 7  | 5.0714 | 1.5392 | 0.5818 | 1 | 4.113 | <b>0.043</b> | 3.446 | 0.083 |  | 5.1 | <b>5.1</b> | C |
| 51 | <b>Vireo</b>       | Island | 13 | 5.6538 | 3.6764 | 1.0197 |   |       |              |       |       |  | 5.7 | <b>5.7</b> | I |
| 52 | <b>Vireo</b>       | Cont   | 5  | 4.4000 | 4.0373 | 1.8055 |   |       |              |       |       |  |     |            |   |
| 53 | <b>Vireo</b>       | Cont   | 3  | 7.6667 | 5.7735 | 3.3333 | 2 | 1.531 | 0.465        | 0.613 | 0.553 |  | 5.6 | <b>5.8</b> | C |
| 54 | <b>Zenaida</b>     | Island | 10 | 6.0500 | 2.6609 | 0.8415 |   |       |              |       |       |  |     |            |   |
| 55 | <b>Zenaida</b>     | Island | 5  | 3.2000 | 1.6047 | 0.7176 |   |       |              |       |       |  |     |            |   |
| 56 | <b>Zenaida</b>     | Island | 1  | 4.5000 | .      | .      |   |       |              |       |       |  | 5.1 | <b>4.8</b> | I |
| 57 | <b>Zenaida</b>     | Cont   | 3  | 5.6667 | 2.2546 | 1.3017 |   |       |              |       |       |  |     |            |   |
| 58 | <b>Zenaida</b>     | Cont   | 1  | 3.0000 | .      | .      |   |       |              |       |       |  |     |            |   |
| 59 | <b>Zenaida</b>     | Cont   | 6  | 4.9583 | 2.0762 | 0.8476 | 5 | 5.705 | 0.336        | 1.241 | 0.327 |  | 5.0 | <b>4.8</b> | C |

Appendix, Table 2B

| LYSIS<br>(titers) |                   |          |  |    |        |        |        |    |                         |              |       |              |                 |                  |            |       |
|-------------------|-------------------|----------|--|----|--------|--------|--------|----|-------------------------|--------------|-------|--------------|-----------------|------------------|------------|-------|
| Pop. #            | Genus             | Origin   |  | n  | Mean   | SD     | SE     | df | K-W<br>Chi <sup>2</sup> | ANOVA        |       |              | Mean<br>(Indiv) | Weighted<br>Mean | Isl/Cont   |       |
|                   |                   | Isl/Cont |  |    |        |        |        |    |                         | Sig          | F     | Sig          |                 |                  |            | Tukey |
| 01                | <i>Anas</i>       | Island   |  | 8  | 4.0000 | 0.5345 | 0.1890 |    |                         |              |       |              |                 |                  |            |       |
| 02                | <i>Anas</i>       | Island   |  | 8  | 4.7500 | 0.4629 | 0.1637 |    |                         |              |       |              | 4.4             | <b>4.4</b>       | I          |       |
| 03                | <i>Anas</i>       | Cont     |  | 8  | 4.7500 | 0.4629 | 0.1637 |    |                         |              |       |              |                 |                  |            |       |
| 04                | <i>Anas</i>       | Cont     |  | 6  | 4.7500 | 0.4183 | 0.1708 | 3  | 9.954                   | <b>0.019</b> | 4.868 | <b>0.008</b> | b               | 4.8              | <b>4.8</b> | C     |
| 05                | <i>Branta</i>     | Island   |  | 5  | 3.9000 | 0.7416 | 0.3317 |    |                         |              |       |              |                 |                  |            |       |
| 06                | <i>Branta</i>     | Island   |  | 8  | 4.5000 | 0.5345 | 0.1890 |    |                         |              |       |              |                 |                  |            |       |
| 07                | <i>Branta</i>     | Island   |  | 7  | 4.0000 | 0.5774 | 0.2182 |    |                         |              |       |              | 4.2             | <b>4.2</b>       | I          |       |
| 08                | <i>Branta</i>     | Cont     |  | 26 | 4.8846 | 0.4540 | 0.0890 | 3  | 16.197                  | <b>0.001</b> | 8.792 | <b>0.000</b> | b               | 4.9              | <b>4.9</b> | C     |
| 09                | <i>Buteo</i>      | Island   |  | 3  | 0.0000 | 0.0000 | 0.0000 |    |                         |              |       |              |                 |                  |            |       |
| 10                | <i>Buteo</i>      | Island   |  | 15 | 0.3833 | 0.8497 | 0.2194 |    |                         |              |       |              |                 |                  |            |       |
| 11                | <i>Buteo</i>      | Island   |  | 3  | 0.0000 | 0.0000 | 0.0000 |    |                         |              |       |              |                 |                  |            |       |
| 12                | <i>Buteo</i>      | Island   |  | 5  | 0.4000 | 0.8944 | 0.4000 |    |                         |              |       |              |                 |                  |            |       |
| 13                | <i>Buteo</i>      | Island   |  | 7  | 0.2857 | 0.7559 | 0.2857 |    |                         |              |       |              |                 |                  |            |       |
| 14                | <i>Buteo</i>      | Island   |  | 8  | 0.6250 | 1.4079 | 0.4978 |    |                         |              |       |              |                 |                  |            |       |
| 15                | <i>Buteo</i>      | Island   |  | 5  | 0.0000 | 0.0000 | 0.0000 |    |                         |              |       |              |                 |                  |            |       |
| 16                | <i>Buteo</i>      | Island   |  | 5  | 0.2000 | 0.4472 | 0.2000 |    |                         |              |       |              | 0.3             | <b>0.3</b>       | I          |       |
| 17                | <i>Buteo</i>      | Cont     |  | 21 | 0.0714 | 0.3273 | 0.0714 | 8  | 6.202                   | 0.625        | 0.675 | 0.712        | 0.1             | <b>0.1</b>       | C          |       |
| 18                | <i>Cardinalis</i> | Island   |  | 2  | 0.0000 | 0.0000 | 0.0000 |    |                         |              |       |              |                 |                  |            |       |
| 19                | <i>Cardinalis</i> | Island   |  | 22 | 1.0455 | 1.4712 | 0.3137 |    |                         |              |       |              |                 |                  |            |       |
| 20                | <i>Cardinalis</i> | Island   |  | 5  | 0.9000 | 1.7464 | 0.7810 |    |                         |              |       |              | 0.9             | <b>0.8</b>       | I          |       |
| 21                | <i>Cardinalis</i> | Cont     |  | 9  | 0.0000 | 0.0000 | 0.0000 |    |                         |              |       |              |                 |                  |            |       |
| 22                | <i>Cardinalis</i> | Cont     |  | 11 | 0.0000 | 0.0000 | 0.0000 |    |                         |              |       |              |                 |                  |            |       |
| 23                | <i>Cardinalis</i> | Cont     |  | 10 | 0.5000 | 1.0801 | 0.3416 |    |                         |              |       |              |                 |                  |            |       |
| 24                | <i>Cardinalis</i> | Cont     |  | 3  | 1.3333 | 2.3094 | 1.3333 | 6  | 10.231                  | 0.115        | 1.679 | 0.143        | 0.3             | <b>0.3</b>       | C          |       |
| 25                | <i>Columba</i>    | Island   |  | 8  | 0.0000 | 0.0000 | 0.0000 |    |                         |              |       |              |                 |                  |            |       |
| 26                | <i>Columba</i>    | Island   |  | 5  | 0.0000 | 0.0000 | 0.0000 |    |                         |              |       |              | 0.0             | <b>0.0</b>       | I          |       |
| 27                | <i>Columba</i>    | Cont     |  | 7  | 0.0000 | 0.0000 | 0.0000 | 2  | 1.000                   | 0.000        | .     | .            | 0.0             | <b>0.0</b>       | C          |       |
| 28                | <i>Columbina</i>  | Island   |  | 15 | 0.0000 | 0.0000 | 0.0000 |    |                         |              |       |              | 0.0             | <b>0.0</b>       | I          |       |
| 29                | <i>Columbina</i>  | Cont     |  | 6  | 0.0000 | 0.0000 | 0.0000 | 1  | 1.000                   | 0.000        | .     | .            | 0.0             | <b>0.0</b>       | C          |       |
| 30                | <i>Dendroica</i>  | Island   |  | 8  | 0.0000 | 0.0000 | 0.0000 |    |                         |              |       |              |                 |                  |            |       |
| 31                | <i>Dendroica</i>  | Island   |  | 8  | 0.0000 | 0.0000 | 0.0000 |    |                         |              |       |              | 0.0             | <b>0.0</b>       | I          |       |
| 32                | <i>Dendroica</i>  | Cont     |  | 5  | 0.6000 | 0.8216 | 0.3674 | 2  | 6.737                   | <b>0.034</b> | 4.571 | <b>0.025</b> | b               | 0.6              | <b>0.6</b> | C     |

|    |                    |        |    |        |        |        |   |       |              |        |              |     |            |            |   |
|----|--------------------|--------|----|--------|--------|--------|---|-------|--------------|--------|--------------|-----|------------|------------|---|
| 33 | <i>Dumetella</i>   | Island | 13 | 3.2692 | 1.1835 | 0.3282 |   |       |              |        |              | 3.3 | <b>3.3</b> | I          |   |
| 34 | <i>Dumetella</i>   | Cont   | 17 | 2.9412 | 1.6191 | 0.3927 |   |       |              |        |              |     |            |            |   |
| 35 | <i>Dumetella</i>   | Cont   | 19 | 3.7105 | 1.1939 | 0.2739 |   |       |              |        |              |     |            |            |   |
| 36 | <i>Dumetella</i>   | Cont   | 2  | 2.0000 | 2.8284 | 2.0000 | 3 | 3.863 | 0.277        | 1.483  | 0.231        | 3.3 | <b>3.1</b> | C          |   |
| 37 | <i>Hemignathus</i> | Island | 2  | 0.0000 | 0.0000 | 0.0000 |   |       |              |        |              |     |            |            |   |
| 38 | <i>Carpodacus</i>  | Island | 16 | 0.0000 | 0.0000 | 0.0000 |   |       |              |        |              |     |            |            |   |
| 39 | <i>Carpodacus</i>  | Island | 16 | 0.0000 | 0.0000 | 0.0000 |   |       |              |        |              | 0.0 | <b>0.0</b> | I          |   |
| 40 | <i>Carpodacus</i>  | Cont   | 4  | 0.0000 | 0.0000 | 0.0000 | 3 | 1.000 | 0.000        | .      | .            | 0.0 | <b>0.0</b> | C          |   |
| 41 | <i>Nesomimus</i>   | Island | 8  | 1.5625 | 1.4985 | 0.5298 |   |       |              |        |              | 1.6 | <b>1.6</b> | I          |   |
| 42 | <i>Mimus</i>       | Cont   | 8  | 1.0000 | 1.3093 | 0.4629 | 1 | 0.974 | 0.324        | 0.639  | 0.437        | 1.0 | <b>1.0</b> | C          |   |
| 43 | <i>Passer</i>      | Island | 26 | 0.3654 | 0.8192 | 0.1607 |   |       |              |        |              |     |            | a          |   |
| 44 | <i>Passer</i>      | Island | 13 | 0.6154 | 1.1022 | 0.3057 |   |       |              |        |              |     |            | ab         |   |
| 45 | <i>Passer</i>      | Island | 6  | 1.5833 | 1.9600 | 0.8002 |   |       |              |        |              | 0.6 | <b>0.7</b> | I          |   |
| 46 | <i>Passer</i>      | Cont   | 12 | 0.0000 | 0.0000 | 0.0000 | 3 | 7.325 | 0.062        | 3.720  | <b>0.017</b> | a   | 0.0        | <b>0.0</b> | C |
| 47 | <i>Sialia</i>      | Island | 7  | 0.0000 | 0.0000 | 0.0000 |   |       |              |        |              | a   | 0.0        | <b>0.0</b> | I |
| 48 | <i>Sialia</i>      | Cont   | 11 | 1.2273 | 1.4554 | 0.4388 | 1 | 5.139 | <b>0.023</b> | 4.867  | <b>0.042</b> | b   | 1.2        | <b>1.2</b> | C |
| 49 | <i>Sturnus</i>     | Island | 10 | 0.3500 | 0.9443 | 0.2986 |   |       |              |        |              | a   | 0.4        | <b>0.4</b> | I |
| 50 | <i>Sturnus</i>     | Cont   | 7  | 3.0714 | 1.4268 | 0.5393 | 1 | 8.856 | <b>0.003</b> | 22.602 | <b>0.000</b> | b   | 3.1        | <b>3.1</b> | C |
| 51 | <i>Vireo</i>       | Island | 13 | 2.5000 | 1.9149 | 0.5311 |   |       |              |        |              | a   | 2.5        | <b>2.5</b> | I |
| 52 | <i>Vireo</i>       | Cont   | 5  | 0.1000 | 0.2236 | 0.1000 |   |       |              |        |              | a   |            |            |   |
| 53 | <i>Vireo</i>       | Cont   | 3  | 1.1667 | 2.0207 | 1.1667 | 2 | 4.826 | 0.090        | 3.771  | <b>0.043</b> | a   | 0.5        | <b>0.6</b> | C |
| 54 | <i>Zenaida</i>     | Island | 10 | 0.0000 | 0.0000 | 0.0000 |   |       |              |        |              |     |            |            |   |
| 55 | <i>Zenaida</i>     | Island | 5  | 0.0000 | 0.0000 | 0.0000 |   |       |              |        |              |     |            |            |   |
| 56 | <i>Zenaida</i>     | Island | 1  | 0.0000 | .      | .      |   |       |              |        |              | 0.0 | <b>0.0</b> | I          |   |
| 57 | <i>Zenaida</i>     | Cont   | 3  | 0.0000 | 0.0000 | 0.0000 |   |       |              |        |              |     |            |            |   |
| 58 | <i>Zenaida</i>     | Cont   | 1  | 0.0000 | .      | .      |   |       |              |        |              |     |            |            |   |
| 59 | <i>Zenaida</i>     | Cont   | 6  | 0.0000 | 0.0000 | 0.0000 | 5 | 1.000 | 0.000        | .      | .            | 0.0 | <b>0.0</b> | C          |   |

Appendix, Table 3

| [HAPTOGLOBIN]<br>(mg/mL) |                    | Origin   |    | ANOVA  |        |        |    |                         |              |        | Mean         | Weighted |         |              |          |
|--------------------------|--------------------|----------|----|--------|--------|--------|----|-------------------------|--------------|--------|--------------|----------|---------|--------------|----------|
| Pop. #                   | Genus              | Isl/Cont | N  | Mean   | SD     | SE     | df | K-W<br>Chi <sup>2</sup> | Sig          | F      | Sig          | Tukey    | (Indiv) | Mean         | Isl/Cont |
| 01                       | <i>Anas</i>        | Island   | 8  | 0.1838 | 0.0635 | 0.0224 |    |                         |              |        |              | ab       |         |              |          |
| 02                       | <i>Anas</i>        | Island   | 8  | 0.2838 | 0.1373 | 0.0485 |    |                         |              |        |              | b        | 0.234   | <b>0.234</b> | I        |
| 03                       | <i>Anas</i>        | Cont     | 8  | 0.1725 | 0.0602 | 0.0213 |    |                         |              |        |              | ab       |         |              |          |
| 04                       | <i>Anas</i>        | Cont     | 6  | 0.1300 | 0.0283 | 0.0115 | 3  | 8.330                   | <b>0.040</b> | 4.268  | <b>0.014</b> | a        | 0.154   | <b>0.153</b> | C        |
| 18                       | <i>Cardinalis</i>  | Island   | 2  | 0.1800 | 0.0141 | 0.0100 |    |                         |              |        |              |          |         |              |          |
| 19                       | <i>Cardinalis</i>  | Island   | 22 | 0.2659 | 0.2462 | 0.0525 |    |                         |              |        |              |          |         |              |          |
| 20                       | <i>Cardinalis</i>  | Island   | 5  | 0.2000 | 0.0985 | 0.0440 |    |                         |              |        |              |          | 0.249   | <b>0.234</b> | I        |
| 23                       | <i>Cardinalis</i>  | Cont     | 11 | 0.1582 | 0.0502 | 0.0151 |    |                         |              |        |              |          |         |              |          |
| 24                       | <i>Cardinalis</i>  | Cont     | 3  | 0.2600 | 0.1997 | 0.1153 | 4  | 4.136                   | 0.388        | 0.649  | 0.631        |          | 0.180   | <b>0.193</b> | C        |
| 28                       | <i>Columbina</i>   | Island   | 7  | 0.1286 | 0.0219 | 0.0083 |    |                         |              |        |              | b        | 0.129   | <b>0.129</b> | I        |
| 29                       | <i>Columbina</i>   | Cont     | 6  | 0.0383 | 0.0147 | 0.0060 | 1  | 9.176                   | <b>0.002</b> | 72.911 | <b>0.000</b> | a        | 0.038   | <b>0.038</b> | C        |
| 30                       | <i>Dendroica</i>   | Island   | 4  | 0.2425 | 0.1053 | 0.0527 |    |                         |              |        |              | b        |         |              |          |
| 31                       | <i>Dendroica</i>   | Island   | 4  | 0.1050 | 0.0624 | 0.0312 |    |                         |              |        |              | a        | 0.174   | <b>0.174</b> | I        |
| 32                       | <i>Dendroica</i>   | Cont     | 6  | 0.1100 | 0.0569 | 0.0232 | 2  | 5.253                   | 0.072        | 4.652  | <b>0.034</b> | ab       | 0.110   | <b>0.110</b> | C        |
| 33                       | <i>Dumetella</i>   | Island   | 13 | 0.4454 | 0.1583 | 0.0439 |    |                         |              |        |              | ab       | 0.445   | <b>0.445</b> | I        |
| 35                       | <i>Dumetella</i>   | Cont     | 20 | 0.3390 | 0.1478 | 0.0838 |    |                         |              |        |              | a        |         |              |          |
| 36                       | <i>Dumetella</i>   | Cont     | 2  | 0.6650 | 0.3748 | 0.2650 | 2  | 5.352                   | 0.069        | 4.511  | <b>0.019</b> | b        | 0.369   | <b>0.417</b> | C        |
| 37                       | <i>Hemignathus</i> | Island   | 2  | 0.1200 | 0.0424 | 0.0300 |    |                         |              |        |              |          |         |              |          |
| 38                       | <i>Carpodacus</i>  | Island   | 4  | 0.1150 | 0.0603 | 0.0301 |    |                         |              |        |              |          |         |              |          |
| 39                       | <i>Carpodacus</i>  | Island   | 4  | 0.1275 | 0.0386 | 0.0193 |    |                         |              |        |              |          | 0.121   | <b>0.121</b> | I        |
| 40                       | <i>Carpodacus</i>  | Cont     | 4  | 0.0725 | 0.0150 | 0.0075 | 3  | 4.322                   | 0.229        | 1.314  | 0.324        |          | 0.073   | <b>0.073</b> | C        |
| 43                       | <i>Passer</i>      | Island   | 6  | 0.0650 | 0.0451 | 0.0184 |    |                         |              |        |              |          |         |              |          |
| 44                       | <i>Passer</i>      | Island   | 2  | 0.0700 | 0.0283 | 0.0200 |    |                         |              |        |              |          |         |              |          |
| 45                       | <i>Passer</i>      | Island   | 4  | 0.1375 | 0.0556 | 0.0278 |    |                         |              |        |              |          | 0.090   | <b>0.091</b> | I        |
| 46                       | <i>Passer</i>      | Cont     | 9  | 0.0833 | 0.0472 | 0.0157 | 3  | 4.464                   | 0.216        | 2.057  | 0.144        |          | 0.083   | <b>0.083</b> | C        |
| 47                       | <i>Sialia</i>      | Island   | 7  | 0.1643 | 0.0877 | 0.0332 |    |                         |              |        |              |          | 0.164   | <b>0.164</b> | I        |
| 48                       | <i>Sialia</i>      | Cont     | 7  | 0.1229 | 0.0647 | 0.0245 | 1  | 1.209                   | 0.272        | 1.011  | 0.335        |          | 0.123   | <b>0.123</b> | C        |
| 54                       | <i>Zenaida</i>     | Island   | 10 | 0.1220 | 0.0781 | 0.0247 |    |                         |              |        |              |          |         |              |          |
| 55                       | <i>Zenaida</i>     | Island   | 5  | 0.1180 | 0.0726 | 0.0325 |    |                         |              |        |              |          |         |              |          |
| 56                       | <i>Zenaida</i>     | Island   | 1  | 0.1100 | .      | .      |    |                         |              |        |              |          | 0.120   | <b>0.119</b> | I        |
| 57                       | <i>Zenaida</i>     | Cont     | 2  | 0.0477 | 0.0039 | 0.0325 |    |                         |              |        |              |          |         |              |          |
| 58                       | <i>Zenaida</i>     | Cont     | 1  | 0.0596 | .      | .      |    |                         |              |        |              |          |         |              |          |
| 59                       | <i>Zenaida</i>     | Cont     | 6  | 0.1050 | 0.0704 | 0.0287 | 5  | 3.210                   | 0.668        | 0.458  | 0.803        |          | 0.087   | <b>0.079</b> | C        |



Appendix, Table 4

| <b>[HETEROPHIL]</b><br>(no.*10 <sup>3</sup> /uL) |                   |          |  |    |        |        |        |    |                         |              |       |              |       |                 |                  |          |
|--------------------------------------------------|-------------------|----------|--|----|--------|--------|--------|----|-------------------------|--------------|-------|--------------|-------|-----------------|------------------|----------|
| Pop. #                                           | Genus             | Origin   |  | n  | Mean   | SD     | SE     | df | K-W<br>Chi <sup>2</sup> | ANOVA        |       |              | Tukey | Mean<br>(Indiv) | Weighted<br>Mean | Isl/Cont |
|                                                  |                   | Isl/Cont |  |    |        |        |        |    |                         | Sig.         | F     | Sig.         |       |                 |                  |          |
| 18                                               | <i>Cardinalis</i> | Isl      |  | 2  | 7.1300 | 4.6810 | 3.3100 |    |                         |              |       |              | b     |                 |                  |          |
| 19                                               | <i>Cardinalis</i> | Isl      |  | 22 | 2.0418 | 1.8308 | 0.3903 |    |                         |              |       |              | a     |                 |                  |          |
| 20                                               | <i>Cardinalis</i> | Isl      |  | 5  | 2.7720 | 2.4757 | 1.1072 |    |                         |              |       |              | a     | 2.52            | <b>3.10</b>      | I        |
| 22                                               | <i>Cardinalis</i> | Cont     |  | 3  | 0.7300 | 0.2166 | 0.1250 |    |                         |              |       |              | a     |                 |                  |          |
| 23                                               | <i>Cardinalis</i> | Cont     |  | 11 | 1.1136 | 0.6449 | 0.1944 |    |                         |              |       |              | a     |                 |                  |          |
| 24                                               | <i>Cardinalis</i> | Cont     |  | 3  | 0.8633 | 0.8223 | 0.4748 | 5  | 14.027                  | <b>0.015</b> | 4.766 | <b>0.002</b> | a     | 1.00            | <b>0.95</b>      | C        |
| 33                                               | <i>Dumetella</i>  | Isl      |  | 10 | 2.4810 | 1.6264 | 0.5143 |    |                         |              |       |              | ab    | 2.48            | <b>2.48</b>      | I        |
| 34                                               | <i>Dumetella</i>  | Cont     |  | 8  | 1.4138 | 0.6344 | 0.2243 |    |                         |              |       |              | a     |                 |                  |          |
| 35                                               | <i>Dumetella</i>  | Cont     |  | 20 | 1.5600 | 1.0213 | 0.2284 |    |                         |              |       |              | a     |                 |                  |          |
| 36                                               | <i>Dumetella</i>  | Cont     |  | 2  | 4.1500 | 3.8467 | 2.7200 | 3  | 3.847                   | 0.278        | 3.469 | <b>0.026</b> | b     | 1.69            | <b>1.93</b>      | C        |
| 54                                               | <i>Zenaida</i>    | Isl      |  | 9  | 3.4589 | 1.8162 | 0.6054 |    |                         |              |       |              |       |                 |                  |          |
| 55                                               | <i>Zenaida</i>    | Isl      |  | 5  | 1.9000 | 1.1594 | 0.5185 |    |                         |              |       |              |       |                 |                  |          |
| 56                                               | <i>Zenaida</i>    | Isl      |  | 1  | 1.7600 | .      | .      |    |                         |              |       |              |       | 2.83            | <b>2.63</b>      | I        |
| 59                                               | <i>Zenaida</i>    | Cont     |  | 6  | 2.5850 | 1.4507 | 0.5923 | 3  | 2.976                   | 0.395        | 1.243 | 0.325        |       | 2.59            | <b>2.59</b>      | C        |

  

| <b>[LYMPHOCYTE]</b><br>(no.*10 <sup>3</sup> /uL) |                   |          |  |    |        |        |        |    |                         |              |       |              |       |                 |                  |          |
|--------------------------------------------------|-------------------|----------|--|----|--------|--------|--------|----|-------------------------|--------------|-------|--------------|-------|-----------------|------------------|----------|
| Pop. #                                           | Genus             | Origin   |  | n  | Mean   | SD     | SE     | df | K-W<br>Chi <sup>2</sup> | ANOVA        |       |              | Tukey | Mean<br>(Indiv) | Weighted<br>Mean | Isl/Cont |
|                                                  |                   | Isl/Cont |  |    |        |        |        |    |                         | Sig.         | F     | Sig.         |       |                 |                  |          |
| 18                                               | <i>Cardinalis</i> | Isl      |  | 2  | 5.405  | 1.775  | 1.2550 |    |                         |              |       |              |       |                 |                  |          |
| 19                                               | <i>Cardinalis</i> | Isl      |  | 22 | 4.793  | 4.520  | 0.9636 |    |                         |              |       |              |       |                 |                  |          |
| 20                                               | <i>Cardinalis</i> | Isl      |  | 5  | 4.056  | 1.940  | 0.8677 |    |                         |              |       |              |       | 4.71            | <b>4.70</b>      | I        |
| 22                                               | <i>Cardinalis</i> | Cont     |  | 3  | 2.450  | 0.611  | 0.3528 |    |                         |              |       |              |       |                 |                  |          |
| 23                                               | <i>Cardinalis</i> | Cont     |  | 11 | 4.334  | 1.193  | 0.3598 |    |                         |              |       |              |       |                 |                  |          |
| 24                                               | <i>Cardinalis</i> | Cont     |  | 3  | 3.513  | 0.782  | 0.4517 | 5  | 7.807                   | 0.167        | 0.342 | 0.884        |       | 3.86            | <b>3.64</b>      | C        |
| 33                                               | <i>Dumetella</i>  | Isl      |  | 10 | 3.3240 | 1.8735 | 0.5924 |    |                         |              |       |              | a     | 3.32            | <b>3.32</b>      | I        |
| 34                                               | <i>Dumetella</i>  | Cont     |  | 8  | 3.1350 | 1.1650 | 0.4119 |    |                         |              |       |              | a     |                 |                  |          |
| 35                                               | <i>Dumetella</i>  | Cont     |  | 20 | 5.0200 | 1.8285 | 0.4089 |    |                         |              |       |              | a     |                 |                  |          |
| 36                                               | <i>Dumetella</i>  | Cont     |  | 2  | 4.0400 | 1.0889 | 0.7700 | 3  | 9.995                   | <b>0.019</b> | 3.427 | <b>0.027</b> | a     | 4.45            | <b>4.25</b>      | C        |
| 54                                               | <i>Zenaida</i>    | Isl      |  | 9  | 4.6544 | 1.3958 | 0.4653 |    |                         |              |       |              |       |                 |                  |          |
| 55                                               | <i>Zenaida</i>    | Isl      |  | 5  | 4.0800 | 1.5881 | 0.7102 |    |                         |              |       |              |       |                 |                  |          |
| 56                                               | <i>Zenaida</i>    | Isl      |  | 1  | 2.8400 | .      | .      |    |                         |              |       |              |       | 4.34            | <b>4.16</b>      | I        |
| 59                                               | <i>Zenaida</i>    | Cont     |  | 6  | 4.9717 | 2.9316 | 1.1968 | 3  | 1.372                   | 0.712        | 0.427 | 0.736        |       | 4.97            | <b>4.97</b>      | C        |

**[MONOCYTE]**

(no.\*10<sup>3</sup>/uL)

| Pop. # | Genus             | Origin<br>Isl/Cont | n  | Mean   | SD     | SE     | df | K-W<br>Chi <sup>2</sup> | ANOVA<br>Sig. | F     | Sig.         | Tukey | Mean    | Weighted    | Isl/Cont |
|--------|-------------------|--------------------|----|--------|--------|--------|----|-------------------------|---------------|-------|--------------|-------|---------|-------------|----------|
|        |                   |                    |    |        |        |        |    |                         |               |       |              |       | (Indiv) | Mean        |          |
| 18     | <b>Cardinalis</b> | Isl                | 2  | 0.6150 | 0.4031 | 0.2850 |    |                         |               |       |              |       |         |             |          |
| 19     | <b>Cardinalis</b> | Isl                | 22 | 0.6650 | 1.0278 | 0.2191 |    |                         |               |       |              |       |         |             |          |
| 20     | <b>Cardinalis</b> | Isl                | 5  | 0.2540 | 0.0750 | 0.0336 |    |                         |               |       |              |       | 0.59    | <b>0.55</b> | I        |
| 22     | <b>Cardinalis</b> | Cont               | 3  | 0.0700 | 0.1212 | 0.0700 |    |                         |               |       |              |       |         |             |          |
| 23     | <b>Cardinalis</b> | Cont               | 11 | 0.3873 | 0.2576 | 0.0777 |    |                         |               |       |              |       |         |             |          |
| 24     | <b>Cardinalis</b> | Cont               | 3  | 0.2367 | 0.1721 | 0.0994 | 5  | 8.394                   | 0.136         | 0.630 | 0.678        |       | 0.30    | <b>0.27</b> | C        |
| 33     | <b>Dumetella</b>  | Isl                | 10 | 0.5150 | 0.4217 | 0.1334 |    |                         |               |       |              |       | 0.52    | <b>0.52</b> | I        |
| 34     | <b>Dumetella</b>  | Cont               | 8  | 0.1075 | 0.1156 | 0.0409 |    |                         |               |       |              |       |         |             |          |
| 35     | <b>Dumetella</b>  | Cont               | 20 | 0.3480 | 0.2320 | 0.0519 |    |                         |               |       |              |       |         |             |          |
| 36     | <b>Dumetella</b>  | Cont               | 2  | 0.4450 | 0.4455 | 0.3150 | 3  | 8.579                   | <b>0.035</b>  | 3.130 | <b>0.037</b> | a     | 0.29    | <b>0.29</b> | C        |
| 54     | <b>Zenaida</b>    | Isl                | 9  | 0.2444 | 0.3091 | 0.1030 |    |                         |               |       |              |       |         |             |          |
| 55     | <b>Zenaida</b>    | Isl                | 5  | 0.3060 | 0.1585 | 0.0709 |    |                         |               |       |              |       |         |             |          |
| 56     | <b>Zenaida</b>    | Isl                | 1  | 0.2500 | .      | .      |    |                         |               |       |              |       | 0.27    | <b>0.27</b> | I        |
| 59     | <b>Zenaida</b>    | Cont               | 6  | 0.2950 | 0.3190 | 0.1302 | 3  | 0.632                   | 0.889         | 0.067 | 0.977        |       | 0.30    | <b>0.30</b> | C        |

**[EOSINOPHIL]**

(no.\*10<sup>3</sup>/uL)

| Pop. # | Genus             | Origin<br>Isl/Cont | n  | Mean   | SD     | SE     | df | K-W<br>Chi <sup>2</sup> | ANOVA<br>Sig. | F     | Sig.  | Tukey | Mean    | Weighted     | Isl/Cont |
|--------|-------------------|--------------------|----|--------|--------|--------|----|-------------------------|---------------|-------|-------|-------|---------|--------------|----------|
|        |                   |                    |    |        |        |        |    |                         |               |       |       |       | (Indiv) | Mean         |          |
| 18     | <b>Cardinalis</b> | Isl                | 2  | 0.0000 | 0.0000 | 0.0000 |    |                         |               |       |       |       |         |              |          |
| 19     | <b>Cardinalis</b> | Isl                | 22 | 0.0382 | 0.0844 | 0.0180 |    |                         |               |       |       |       |         |              |          |
| 20     | <b>Cardinalis</b> | Isl                | 5  | 0.0580 | 0.1297 | 0.0580 |    |                         |               |       |       |       | 0.039   | <b>0.037</b> | I        |
| 22     | <b>Cardinalis</b> | Cont               | 3  | 0.0533 | 0.0924 | 0.0533 |    |                         |               |       |       |       |         |              |          |
| 23     | <b>Cardinalis</b> | Cont               | 11 | 0.0155 | 0.0513 | 0.0155 |    |                         |               |       |       |       |         |              |          |
| 24     | <b>Cardinalis</b> | Cont               | 3  | 0.0233 | 0.0404 | 0.0233 | 5  | 1.813                   | 0.874         | 0.328 | 0.893 |       | 0.024   | <b>0.027</b> | C        |
| 33     | <b>Dumetella</b>  | Isl                | 10 | 0.1250 | 0.1822 | 0.0576 |    |                         |               |       |       |       | 0.125   | <b>0.125</b> | I        |
| 34     | <b>Dumetella</b>  | Cont               | 8  | 0.1725 | 0.2159 | 0.0763 |    |                         |               |       |       |       |         |              |          |
| 35     | <b>Dumetella</b>  | Cont               | 20 | 0.0325 | 0.0675 | 0.0151 |    |                         |               |       |       |       |         |              |          |
| 36     | <b>Dumetella</b>  | Cont               | 2  | 0.0650 | 0.0919 | 0.0650 | 3  | 3.612                   | 0.307         | 2.220 | 0.103 |       | 0.072   | <b>0.083</b> | C        |
| 54     | <b>Zenaida</b>    | Isl                | 9  | 0.1089 | 0.2011 | 0.0670 |    |                         |               |       |       |       |         |              |          |
| 55     | <b>Zenaida</b>    | Isl                | 5  | 0.0340 | 0.0760 | 0.0340 |    |                         |               |       |       |       |         |              |          |
| 56     | <b>Zenaida</b>    | Isl                | 1  | 0.0500 | .      | .      |    |                         |               |       |       |       | 0.080   | <b>0.073</b> | I        |
| 59     | <b>Zenaida</b>    | Cont               | 6  | 0.0000 | 0.0000 | 0.0000 | 3  | 4.081                   | 0.253         | 0.759 | 0.532 |       | 0.000   | <b>0.000</b> | C        |

**[BASOPHIL]**

(no.\*10<sup>3</sup>/uL)

| Pop. # | Genus             | Origin<br>Isl/Cont | n  | Mean   | SD     | SE     | df | K-W<br>Chi <sup>2</sup> | Sig.  | ANOVA |       | Tukey | Mean    | Weighted     | Isl/Cont |
|--------|-------------------|--------------------|----|--------|--------|--------|----|-------------------------|-------|-------|-------|-------|---------|--------------|----------|
|        |                   |                    |    |        |        |        |    |                         |       | F     | Sig.  |       | (Indiv) | Mean         |          |
| 18     | <i>Cardinalis</i> | Isl                | 2  | 0.0000 | 0.0000 | 0.0000 |    |                         |       |       |       |       |         |              |          |
| 19     | <i>Cardinalis</i> | Isl                | 22 | 0.0087 | 0.0297 | 0.0063 |    |                         |       |       |       |       |         |              |          |
| 20     | <i>Cardinalis</i> | Isl                | 5  | 0.0000 | 0.0000 | 0.0000 |    |                         |       |       |       |       | 0.007   | <b>0.005</b> | I        |
| 22     | <i>Cardinalis</i> | Cont               | 3  | 0.0000 | 0.0000 | 0.0000 |    |                         |       |       |       |       |         |              |          |
| 23     | <i>Cardinalis</i> | Cont               | 11 | 0.0000 | 0.0000 | 0.0000 |    |                         |       |       |       |       |         |              |          |
| 24     | <i>Cardinalis</i> | Cont               | 3  | 0.0000 | 0.0000 | 0.0000 | 5  | 2.230                   | 0.816 | 0.377 | 0.862 |       | 0.000   | <b>0.000</b> | C        |
| 33     | <i>Dumetella</i>  | Isl                | 10 | 0.0340 | 0.0943 | 0.0298 |    |                         |       |       |       |       | 0.034   | <b>0.034</b> | I        |
| 34     | <i>Dumetella</i>  | Cont               | 8  | 0.0000 | 0.0000 | 0.0000 |    |                         |       |       |       |       |         |              |          |
| 35     | <i>Dumetella</i>  | Cont               | 20 | 0.0120 | 0.0537 | 0.0120 |    |                         |       |       |       |       |         |              |          |
| 36     | <i>Dumetella</i>  | Cont               | 2  | 0.0000 | 0.0000 | 0.0000 | 3  | 3.156                   | 0.368 | 0.537 | 0.660 |       | 0.008   | <b>0.006</b> | C        |
| 54     | <i>Zenaida</i>    | Isl                | 9  | 0.0000 | 0.0000 | 0.0000 |    |                         |       |       |       |       |         |              |          |
| 55     | <i>Zenaida</i>    | Isl                | 5  | 0.0000 | 0.0000 | 0.0000 |    |                         |       |       |       |       |         |              |          |
| 56     | <i>Zenaida</i>    | Isl                | 1  | 0.0000 | .      | .      |    |                         |       |       |       |       | 0.000   | <b>0.000</b> | I        |
| 59     | <i>Zenaida</i>    | Cont               | 6  | 0.0000 | 0.0000 | 0.0000 | 3  | 0.000                   | 1.000 | .     | .     |       | 0.000   | <b>0.000</b> | C        |

**[TOTAL  
LEUKOCYTE]**

(no.\*10<sup>3</sup>/uL)

| Pop. # | Genus             | Origin<br>Isl/Cont | n  | Mean    | SD     | SE     | df | K-W<br>Chi <sup>2</sup> | Sig.  | ANOVA |       | Tukey | Mean    | Weighted    | Isl/Cont |
|--------|-------------------|--------------------|----|---------|--------|--------|----|-------------------------|-------|-------|-------|-------|---------|-------------|----------|
|        |                   |                    |    |         |        |        |    |                         |       | F     | Sig.  |       | (Indiv) | Mean        |          |
| 18     | <i>Cardinalis</i> | Isl                | 2  | 13.1500 | 6.8589 | 4.8500 |    |                         |       |       |       |       |         |             |          |
| 19     | <i>Cardinalis</i> | Isl                | 22 | 7.5455  | 7.2152 | 1.5383 |    |                         |       |       |       |       |         |             |          |
| 20     | <i>Cardinalis</i> | Isl                | 5  | 7.1400  | 4.2741 | 1.9114 |    |                         |       |       |       |       | 7.86    | <b>8.39</b> | I        |
| 22     | <i>Cardinalis</i> | Cont               | 3  | 3.4333  | 0.5132 | 0.2963 |    |                         |       |       |       |       |         |             |          |
| 23     | <i>Cardinalis</i> | Cont               | 11 | 5.8455  | 1.2817 | 0.3864 |    |                         |       |       |       |       |         |             |          |
| 24     | <i>Cardinalis</i> | Cont               | 3  | 4.6333  | 1.4640 | 0.8452 | 5  | 10.841                  | 0.055 | 0.980 | 0.442 |       | 5.21    | <b>4.92</b> | C        |
| 33     | <i>Dumetella</i>  | Isl                | 10 | 6.4900  | 3.2220 | 1.0189 |    |                         |       |       |       |       | 6.49    | <b>6.49</b> | I        |
| 34     | <i>Dumetella</i>  | Cont               | 8  | 4.8250  | 1.8242 | 0.6450 |    |                         |       |       |       |       |         |             |          |
| 35     | <i>Dumetella</i>  | Cont               | 20 | 6.9700  | 2.5567 | 0.5717 |    |                         |       |       |       |       |         |             |          |
| 36     | <i>Dumetella</i>  | Cont               | 2  | 8.7000  | 3.1113 | 2.2000 | 3  | 5.410                   | 0.144 | 1.750 | 0.174 |       | 6.51    | <b>6.55</b> | C        |
| 54     | <i>Zenaida</i>    | Isl                | 9  | 8.4667  | 3.0830 | 1.0277 |    |                         |       |       |       |       |         |             |          |
| 55     | <i>Zenaida</i>    | Isl                | 5  | 6.3200  | 2.2073 | 0.9871 |    |                         |       |       |       |       |         |             |          |
| 56     | <i>Zenaida</i>    | Isl                | 1  | 4.9000  | .      | .      |    |                         |       |       |       |       | 7.51    | <b>7.12</b> | I        |
| 59     | <i>Zenaida</i>    | Cont               | 6  | 7.8500  | 4.3029 | 1.7567 | 3  | 2.313                   | 0.510 | 0.681 | 0.576 |       | 7.85    | <b>7.85</b> | C        |
